# Supplementary material for: Na0.67Mn1−xMgxO2 (0 ≤ x ≤ 0.2): a high capacity cathode for sodium-ion batteries
Source: Royal Society of Chemistry journal article supplement (doi:10.1039/c4ee00465e), 2014-01-01
Supplement: c4ee00465e1.pdf [file c4ee00465e1.pdf]

## **Na<sub>0.67</sub>Mn<sub>1-x</sub>Mg<sub>x</sub>O<sub>2</sub> (0 ≤ x ≤ 0.2): A High-Capacity Cathode for Sodium Ion Batteries**

Juliette Billaud<sup>1</sup>, Gurpreet Singh<sup>2</sup>, A. Robert Armstrong<sup>1</sup>, Elena Gonzalo<sup>2</sup>, Vladimir Roddatis<sup>2</sup>, Michel Armand<sup>2</sup>, Teófilo Rojo<sup>2</sup> and Peter G. Bruce<sup>1</sup>

<sup>1</sup>School of Chemistry, University of St. Andrews, St. Andrews, Fife KY16 9ST, UK

<sup>2</sup>CIC ENERGIGUNE, Parque Tecnológico de Álava, Albert Einstein 48, ED. CIC,  
01510 Miñano, Spain

### **Experimental :**

Samples of Na<sub>0.67</sub>Mn<sub>1-x</sub>Mg<sub>x</sub>O<sub>2</sub> (x = 0, 0.05, 0.1 and 0.2) were synthesized by two methods: conventional solid-state synthesis and a solution route. The solid-state route involved mixing together the precursors viz. Na<sub>2</sub>CO<sub>3</sub> (Sigma Aldrich, anhydrous ≥ 99.5%), Mn<sub>2</sub>O<sub>3</sub> (Alfa Aesar, 98%) and MgO (Alfa Aesar, 99%) in appropriate ratios using ball milling for 1h. Milled powder samples were compressed in the form of pellets and calcined at 900 °C for 15 h in air followed by quenching and/or furnace cooling. After the heat treatment pellets were ground and stored in an Ar-filled glove box. The solution route involved dissolving appropriate molar ratios of manganese acetate and magnesium acetate tetrahydrates (both Aldrich) in distilled water. Separately, a solution of Na<sub>2</sub>CO<sub>3</sub> (Fisher) dissolved in H<sub>2</sub>O was prepared. Co-precipitation was performed by adding the acetate mixture dropwise to the Na<sub>2</sub>CO<sub>3</sub> (under intensive stirring). H<sub>2</sub>O was removed by evaporation and the resulting solid was dried overnight at 300°C. The powders were pelletized and calcined at 600 °C for 15 hours, quenched, ground and pelletized again. The final calcination was performed at 800 °C for 15 hours in air

followed either by a quench or furnace cooling to room temperature. The samples were then transferred to an Ar-filled glovebox.

Powder X-ray diffraction (XRD) was performed using a Bruker D8 Advance diffractometer, with a Cu anode,  $\lambda = 1.541 \text{ \AA}$ . A Kapton<sup>®</sup> foil was used to cover the samples in order to prevent moisture ingress. Powder X-ray diffraction on charged samples was performed on a Stoe STADI/P diffractometer operating in capillary mode with  $\text{FeK}\alpha_1$  radiation ( $\lambda = 1.936 \text{ \AA}$ ) to eliminate Fe fluorescence. The morphology of all samples was examined using a FEI scanning electron microscope (SEM) Quanta 200FEG operated at 30 keV and equipped with an Apollo 10 SSD EDX detector. Synchrotron powder X-ray diffraction was obtained in capillaries on the I11 diffractometer at the Diamond Light Source, UK. Rietveld refinements of the structures were carried out using the program Topas Academic [1].

For the electrochemical characterization powder samples were coated on an aluminum foil after mixing with carbon black (CB) and polyvinylidene fluoride (PVDF) in the wt % ratio, active material: CB : PVDF = 75 : 15 : 10 followed by slurry formation in N-methyl-2-pyrrolidinone (NMP). Coated foils were dried overnight at 80 °C under vacuum. Electrodes were punched out and used as cathodes in coin cells with sodium metal as anode and glass microfiber (Whatman, GF/A) as separator. Electrode loadings were typically 3-5 mgcm<sup>-2</sup>. 1M NaClO<sub>4</sub> in EC : PC :: 1:1 by wt% was used as the electrolyte. Cells were assembled in the glove box and tested at room temperature using a multichannel Maccor<sup>®</sup> battery tester Series 4000. In order to obtain material for powder X-ray diffraction at the end of charge the electrode was removed, washed with dry dimethyl carbonate and dried. The resulting powder was then transferred to a 0.5mm capillary and sealed.

a)

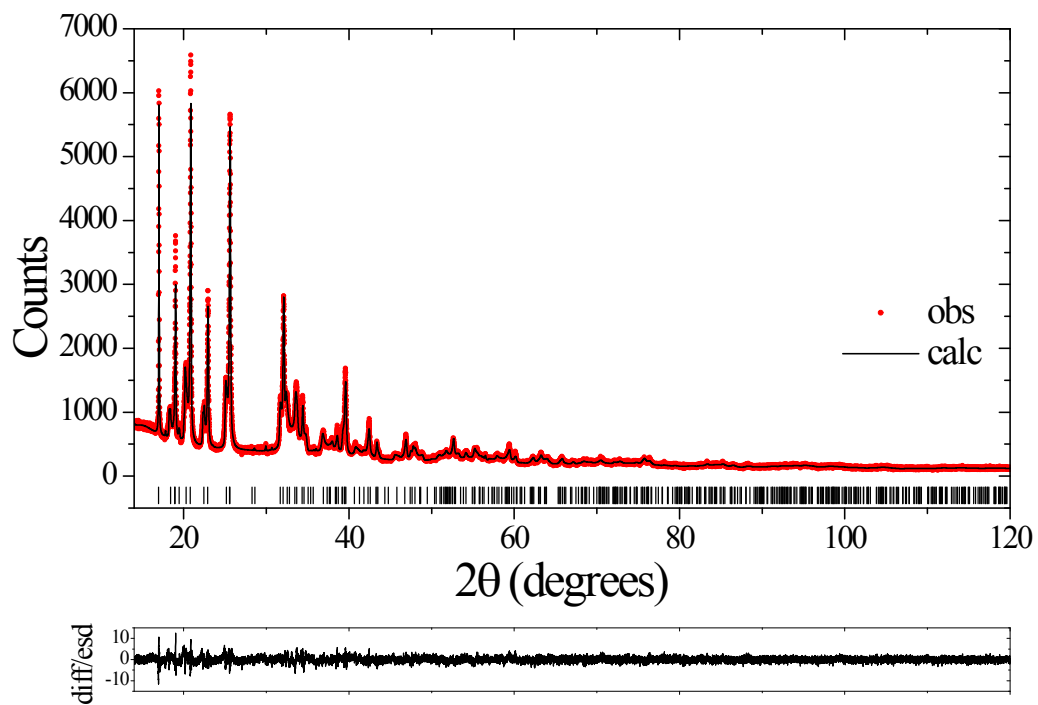

b)

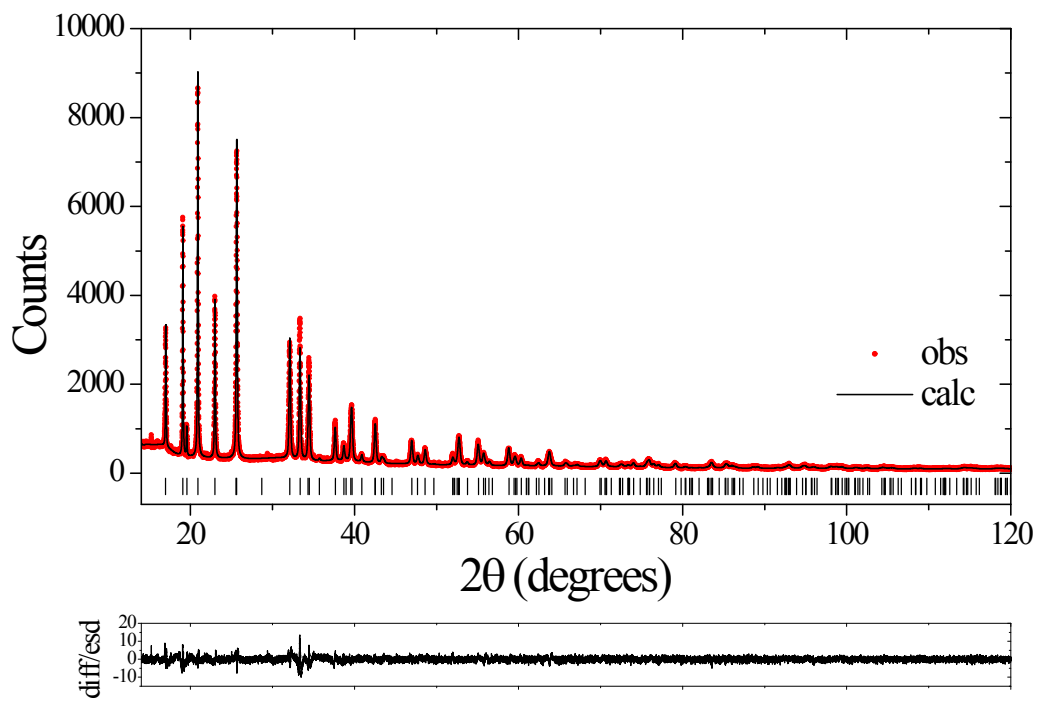

**Fig. S1.** Refined synchrotron powder X-ray diffraction patterns of  $\text{Na}_{0.67}\text{Mn}_{0.9}\text{Mg}_{0.1}\text{O}_2$  for (a) quenched and (b) furnace cooled samples. Dots represent observed data and solid line the calculated pattern. The lower line is the difference/esd.

**Table S1a.** Crystallographic parameters for quenched  $\text{Na}_{0.67}\text{Mn}_{0.9}\text{Mg}_{0.1}\text{O}_2$ .

*Cmcm*.  $a = 2.8445(1) \text{ \AA}$ ,  $b = 5.2264(3) \text{ \AA}$ ,  $c = 11.1802(5) \text{ \AA}$ .

| Atom    | Wyckoff<br>symbol | x/a | y/b        | z/c       | B <sub>iso</sub> | occupancy |
|---------|-------------------|-----|------------|-----------|------------------|-----------|
| Na1     | 4c                | 0.0 | 0.3208(14) | 0.25      | 4.4(3)           | 0.48(1)   |
| Na2     | 4c                | 0.0 | 0.020(4)   | 0.25      | 3.5(5)           | 0.18(1)   |
| Mn1/Mg1 | 4a                | 0.0 | 0.0        | 0.0       | 0.64(2)          | 0.9/0.1   |
| O1      | 8f                | 0.0 | 0.6524(6)  | 0.0912(2) | 0.88(4)          | 1         |

R-factors:  $R_{\text{exp}} = 2.56\%$ ,  $R_{\text{wp}} = 6.71\%$ ,  $R_p = 5.28\%$

**Table S1b.** Crystallographic parameters for slow cooled  $\text{Na}_{0.67}\text{Mn}_{0.9}\text{Mg}_{0.1}\text{O}_2$ .

*P6<sub>3</sub>/mcm*.  $a = 2.88093(6) \text{ \AA}$ ,  $c = 11.2148(4) \text{ \AA}$ .

| Atom    | Wyckoff<br>symbol | x/a    | y/b    | z/c       | B <sub>iso</sub> | occupancy      |
|---------|-------------------|--------|--------|-----------|------------------|----------------|
| Na1     | 2a                | 0.0    | 0.0    | 0.25      | 7.6(4)           | 0.26(1)        |
| Na2     | 4c                | 0.3333 | 0.6667 | 0.25      | 5.5(2)           | 0.39(1)        |
| Mn1/Mg1 | 2b                | 0.0    | 0.0    | 0.0       | 0.599(7)         | 0.853/0.096(2) |
| O1      | 4e                | 0.3333 | 0.6667 | 0.0903(2) | 0.94(3)          | 1              |

R-factors:  $R_{\text{exp}} = 2.79\%$ ,  $R_{\text{wp}} = 7.44\%$ ,  $R_p = 5.69\%$

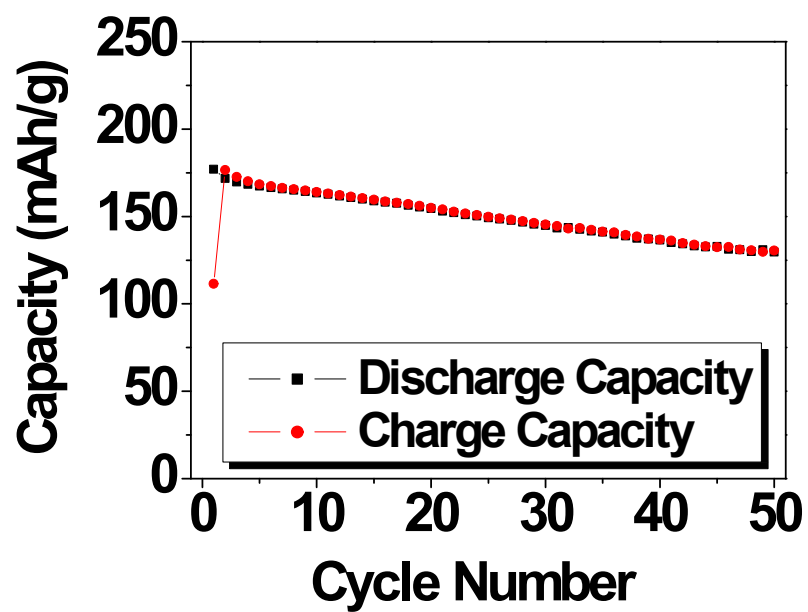

**Fig. S2.** Cycling performance for quenched  $\text{Na}_{0.67}\text{Mn}_{0.95}\text{Mg}_{0.05}\text{O}_2$  up to 50 cycles.

[1] A. A. Coelho, *J. Appl. Cryst.*, 2000 **33** 899.
